# Supplementary material for: Productive Performance, Physiological Variables, and Carcass Quality of Finishing Pigs Supplemented with Ferulic Acid and Grape Pomace Subjected to Heat Stress Conditions
Source: Preprints.org preprint supplement (doi:10.20944/preprints202305.0933.v1), 2023-05-12
Supplement: Supplementary file 2 [file supplementary]

**
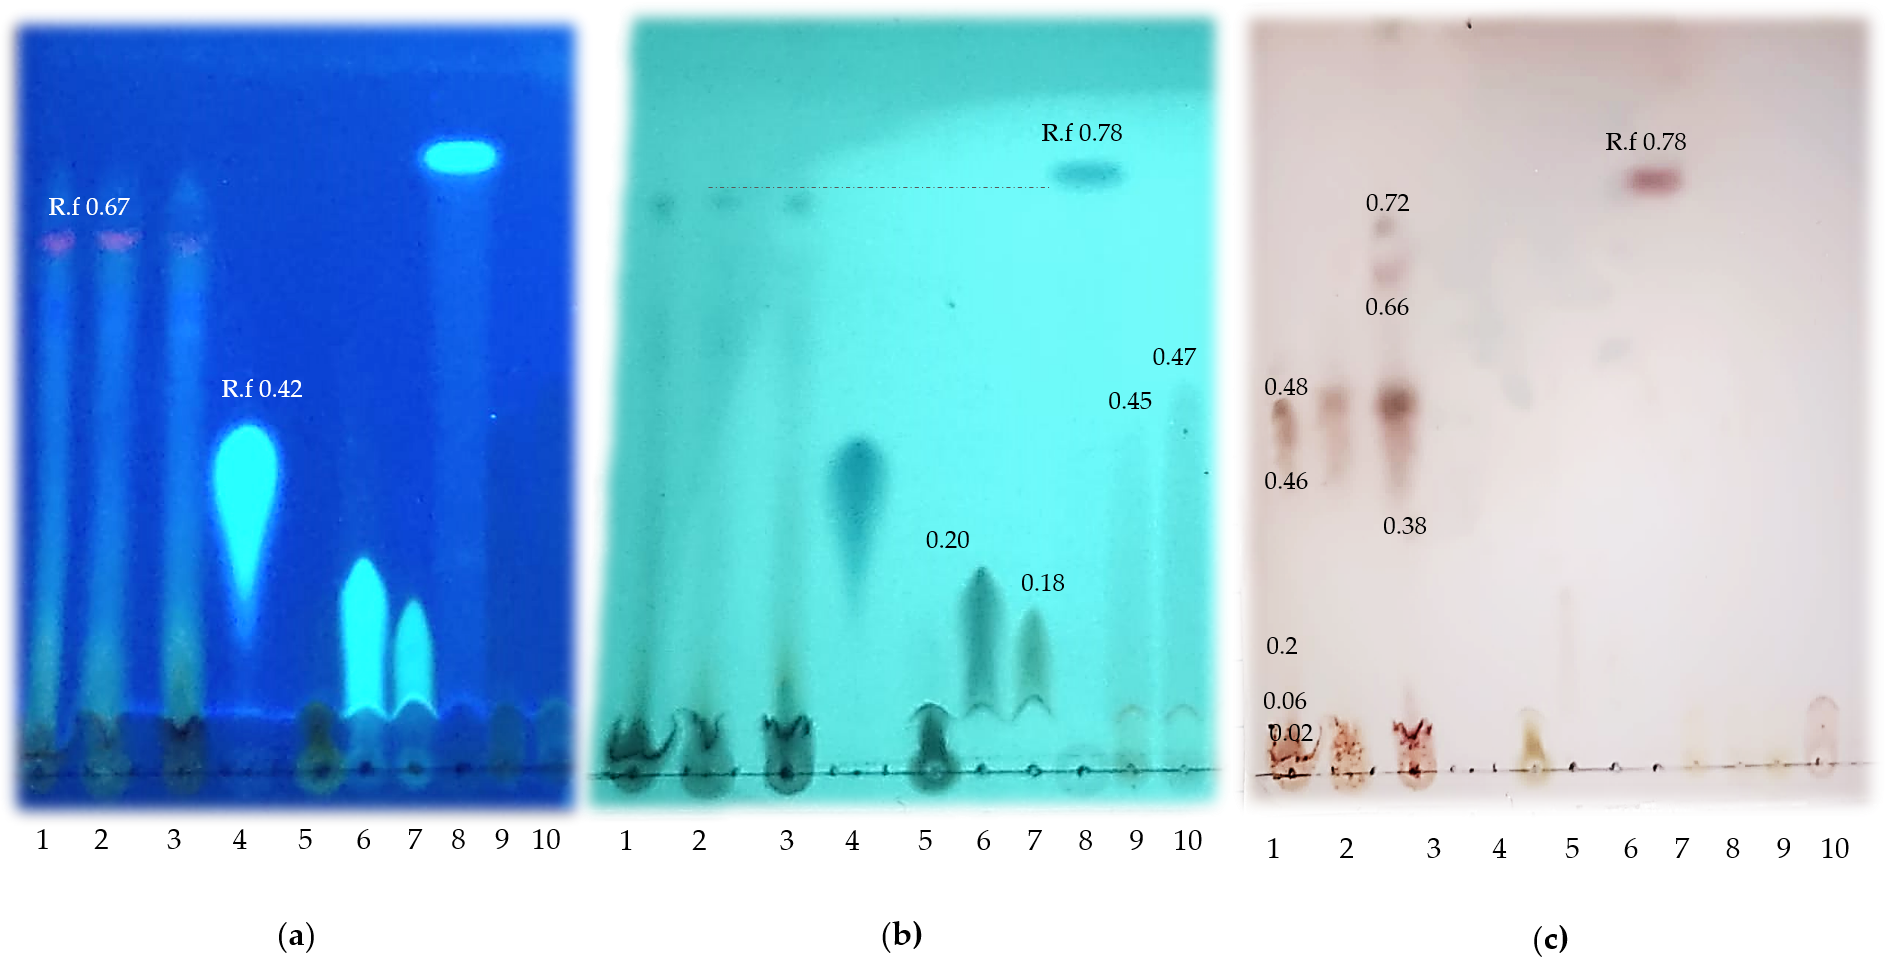
**

**Suplementary Figure S1**. Qualitative characterization of GPM by thin layer chromatography. (**a**) UV (254 nm); (**b**) UV (365 nm); (**c**) Revealed plate. 1 (sample GPM), 2 (Sample dried pomace); 3 (sample fresh pomace); 4 (ferulic acid); 5 (GA); 6 (CGA), 7 (CA); 8 (RES); 9(CAT); 10 (EC). *Rf (Retard factor).

**
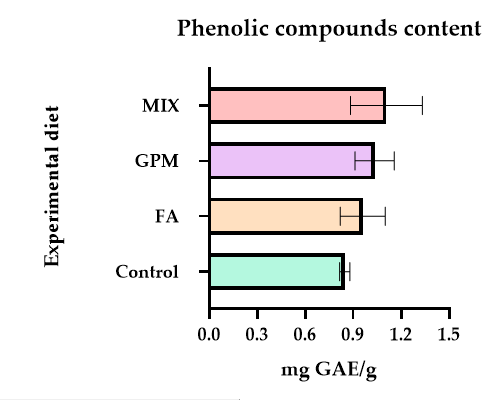
**

**Supplementary Figure S2.** Phenolic compounds content in experimental diets. Control (basal diet, DB without additives); FA, DB + 25 mg FA/ kg feed; GPM, BD + 2.5% GPM/ kg; and MIX, BD + 25 mg FA + 2.5% GPM/kg. GAE: Gallic acid equivalents. Bars are the mean ±standard error of 3 replicates.

**Supplementary Figure S3.** Antioxidant capacity of experimental diets. Control (basal diet, DB without additives); FA, DB + 25 mg FA/ kg feed; GPM, BD + 2.5% GPM/ kg; and MIX, BD + 25 mg FA + 2.5% GPM/kg. Bars are the mean ±standard error of 3 replicates.

**Supplementary Table S1*.*** Hematological and biochemical parameters of finishing pigs supplemented with ferulic acid and grape pomace.

| **Variables** | **Treatments** | | | | | | | | | |  | | **p- value** | | | | | |
| --- | --- | --- | --- | --- | --- | --- | --- | --- | --- | --- | --- | --- | --- | --- | --- | --- | --- | --- |
| **FA** | | **0** | | | | **25 mg** | | | | SEM | | FA | | GPM | | FA x GPM | |
| **GPM** | | **0** | | **2.5%** | | **0** | | **2.5%** | |
| **Hematological parameters** | | | | | | | | | | | | | | | | | | |
| Red blood cells  ( 10^12/µL) |  | | 5.16 | | 5.22 | | 4.92 | | 5.44 | | 0.14 | | 0.931 | | 0.062* | | 0.137 | |
| Hemoglobin, g/dL |  | | 15.24 | | 15.40 | | 14.54 | | 15.91 | | 0.40 | | 0.810 | | 0.082* | | 0.169 | |
| Hematocrit, % |  | | 45.08 | | 45.51 | | 42.91 | | 46.98 | | 1.19 | | 0.770 | | 0.081* | | 0.158 | |
| MCV, fL |  | | 87.1ab | | 87.09ab | | 87.28a | | 86.33b | | 0.19 | | 0.170 | | **0.031** | | **0.050** | |
| MCH, pg |  | | 29.55 | | 28.34 | | 29.47 | | 29.56 | | 0.61 | | 0.533 | | 0.268 | | 0.469 | |
| MCHC, g/dL |  | | 33.81 | | 33.87 | | 33.87 | | 33.84 | | 0.02 | | 0.200 | | 0.882 | | 0.331 | |
| RDW-CV, % |  | | 18.07 | | 18.61 | | 19.66 | | 18.5 | | 0.64 | | 0.273 | | 0.665 | | 0.256 | |
| Platelets (10^3/µL) |  | | 218.0 | | 220.3 | | 163.8 | | 224.6 | | 25.5 | | 0.349 | | 0.245 | | 0.275 | |
| White blood cells (10^9/µL) |  | | 15.32 | | 17.44 | | 17.039 | | 17.236 | | 1.32 | | 0.584 | | 0.409 | | 0.483 | |
| Granulocytes, % |  | | 35.39 | | 33.45 | | 39.51 | | 34.33 | | 2.77 | | 0.384 | | 0.259 | | 0.577 | |
| Lymphocytes, % |  | | 52.13 | | 56.03 | | 50.34 | | 54.40 | | 2.53 | | 0.512 | | 0.184 | | 0.975 | |
| Medium cells, % |  | | 11.1 | | 9.99 | | 11.02 | | 10.44 | | 1.53 | | 0.905 | | 0.609 | | 0.865 | |
| **Biochemical parameters** | | | | | | | | | | | | |  | |  | |  | |
| Glucose, mg/dL |  | | 66.55 | | 69.035 | | 69.41 | | 76.76 | | 5.16 | | 0.290 | | 0.345 | | 0.729 | |
| Total proteins, g/dL |  | | 6.475 | | 6.493 | | 6.524 | | 6.347 | | 0.22 | | 0.839 | | 0.733 | | 0.674 | |
| Albumin, g/dL |  | | 4.163 | | 3.457 | | 3.147 | | 3.416 | | 0.30 | | 0.221 | | 0.264 | | 0.268 | |
| Globulins, g/dL |  | | 2.436 | | 3.008 | | 3.064 | | 2.867 | | 0.30 | | 0.440 | | 0.550 | | 0.220 | |
| A: G ratio |  | | 2.3 | | 1.276 | | 1.243 | | 1.166 | | 0.51 | | 0.281 | | 0.312 | | 0.379 | |
| CK, U/L |  | | 1290.5 | | 1695.6 | | 1141.6 | | 1430.9 | | 226.3 | | 0.386 | | 0.148 | | 0.813 | |
| **Hormonal levels** | |  | |  | |  | |  | |  | |  | |  | |  | |  | |
| Cortisol, µg/dL |  | | 2.189 | | 1.563 | | 2.275 | | 1.66 | | 0.39 | | 0.82 | | 0.155 | | 0.982 | |
| GH, ng/mL |  | | 0.143 | | 0.086 | | 0.036 | | 0.456 | | 0.20 | | 0.572 | | 0.400 | | 0.309 | |
| IGF-1, ng/mL |  | | 158.37 | | 102.02 | | 132.05 | | 155.73 | | 26.61 | | 0.634 | | 0.551 | | 0.164 | |

FA: ferulic acid; GPM: grape pomace meal. MCV: mean corpuscular volume; MCH: mean corpuscular hemoglobin; MCHC: mean corpuscular hemoglobin concentration; RDW-CV: ), erythrocyte distribution; CK: creatine kinase; GH: growth hormone; IGF-1: insulin growth factor 1. A: G, albumin: globulins ratio. Means with different letters, indicate significant difference (p<0.05). * Trends (p<0.10). SEM: Standard error of the mean.
